# Supplementary material
Source: PubMed Central journal article supplement (PMC3132082)

Supplemental Information for Mazzulli et al. 2011.  
I. Supplemental Figures and Figure Legends

Figure S1

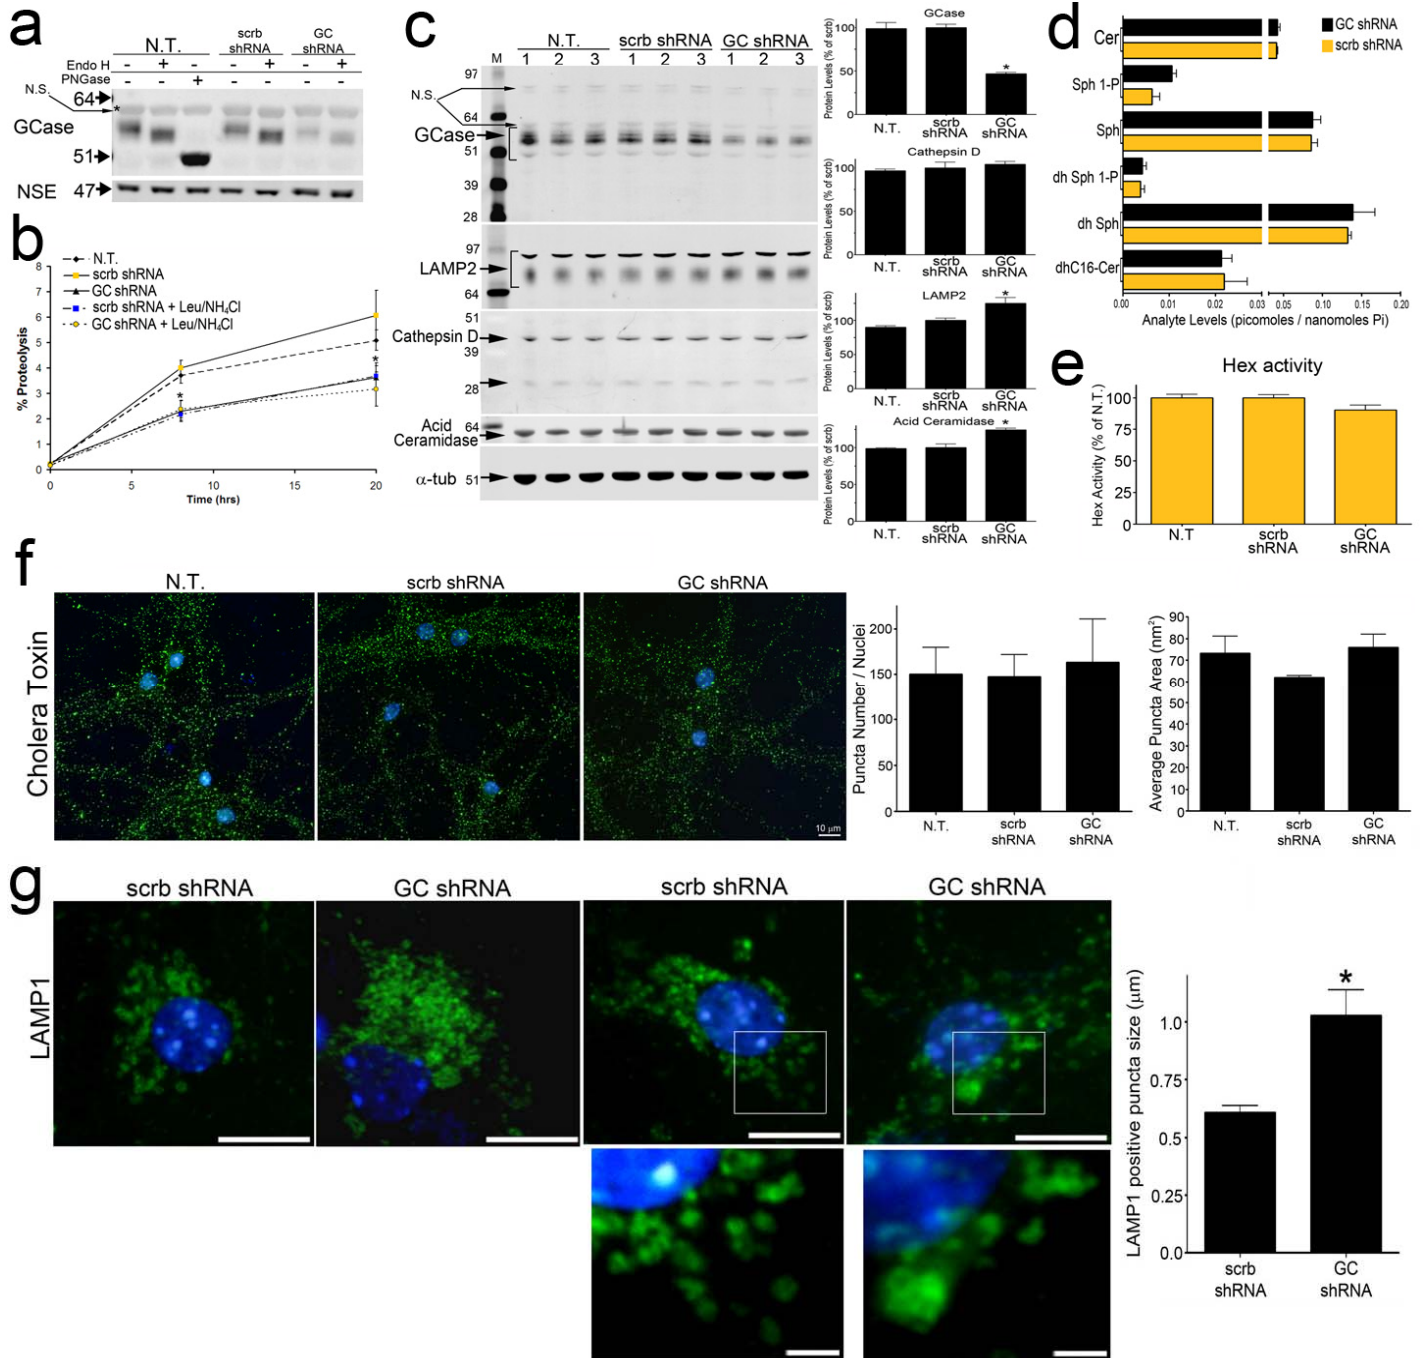

Figure S2

a

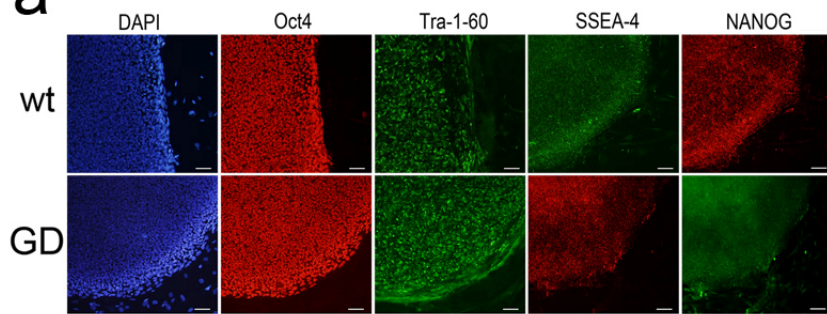

b

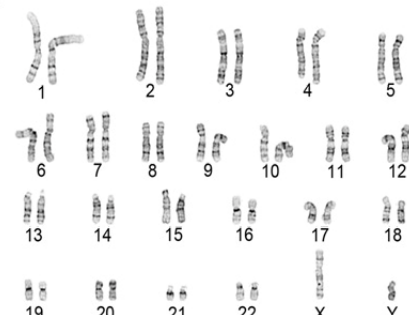

Figure S3

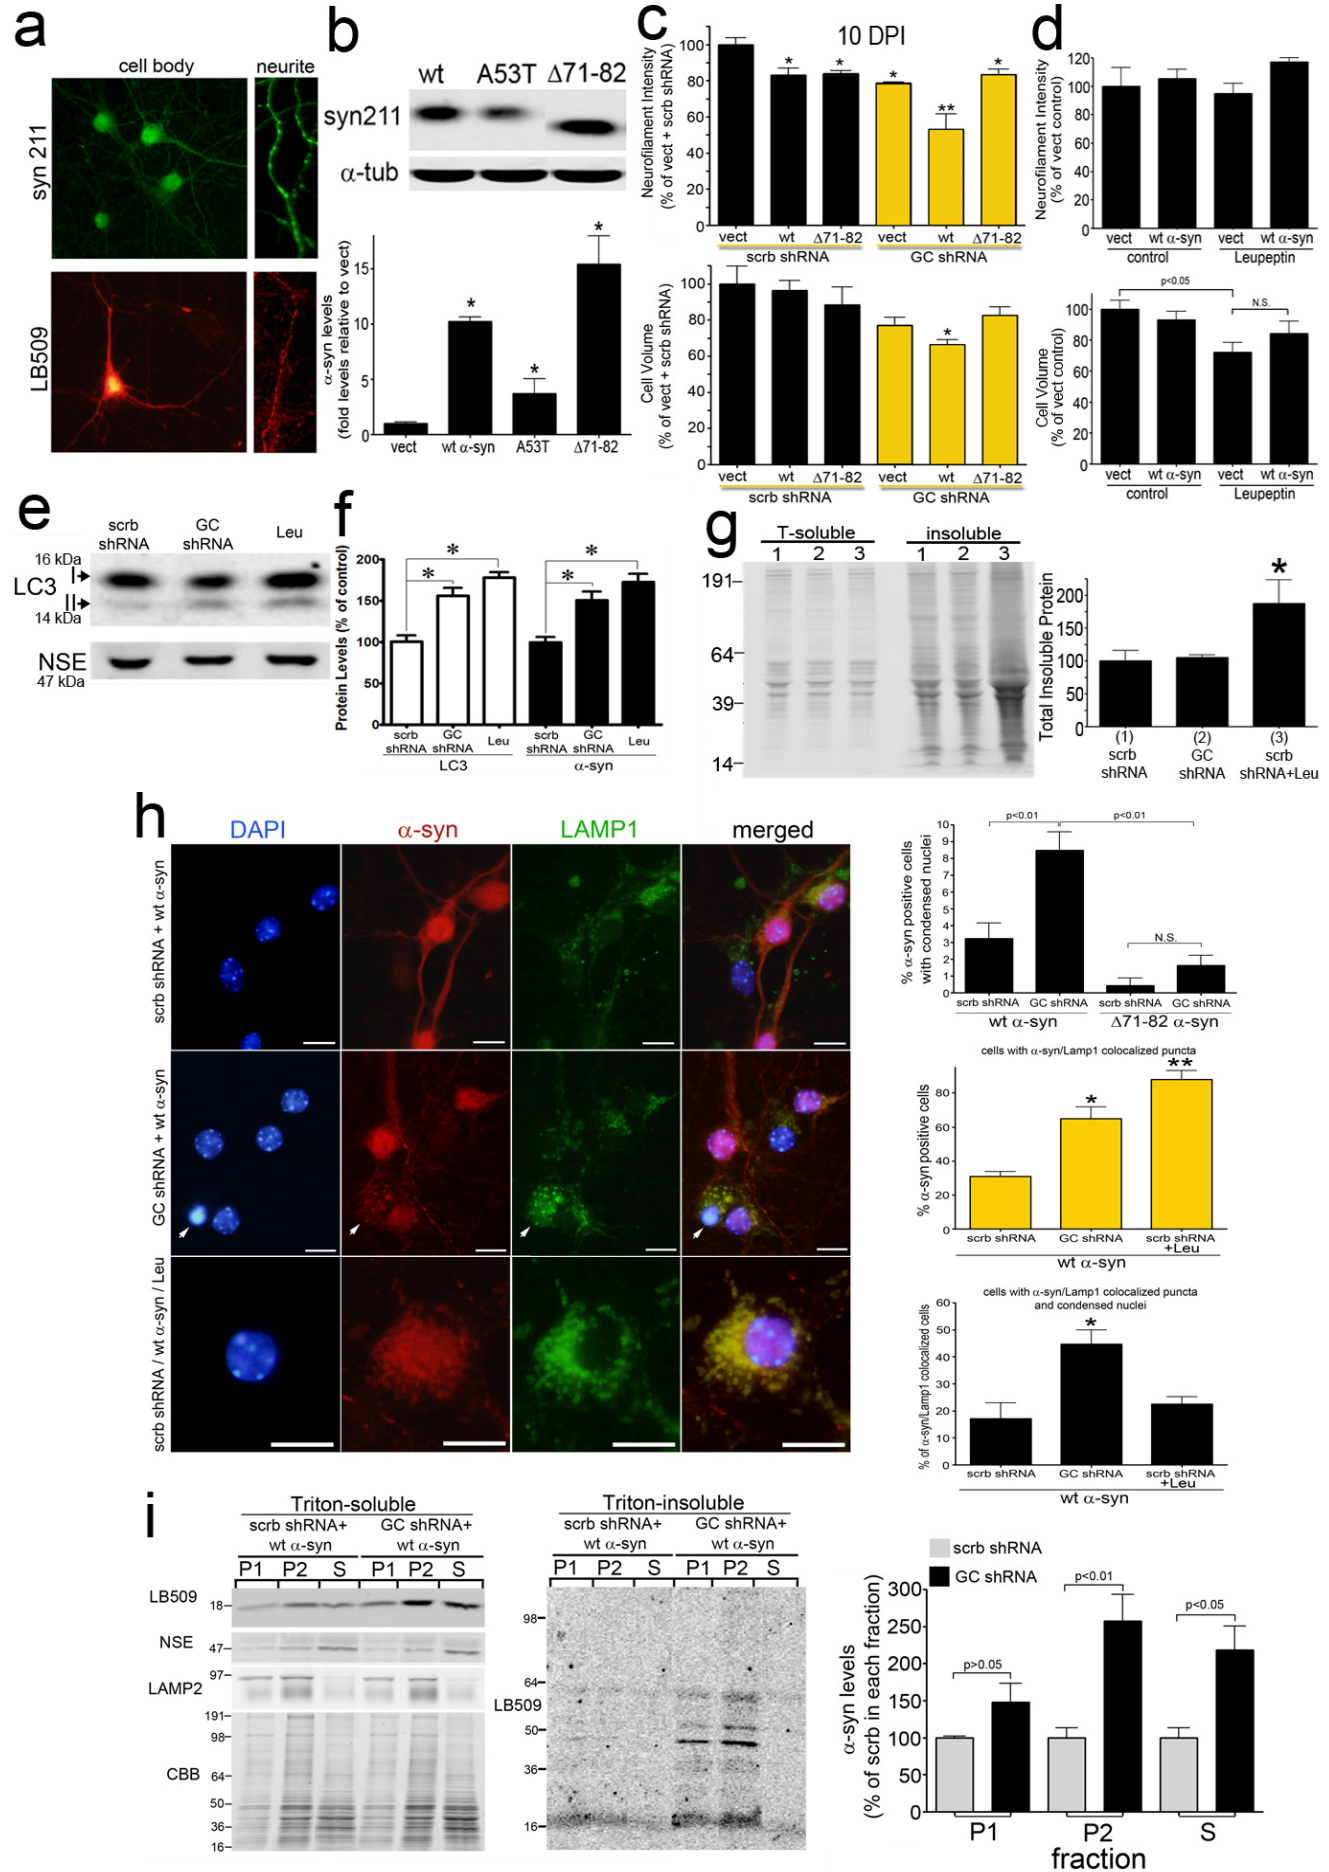

Figure S4

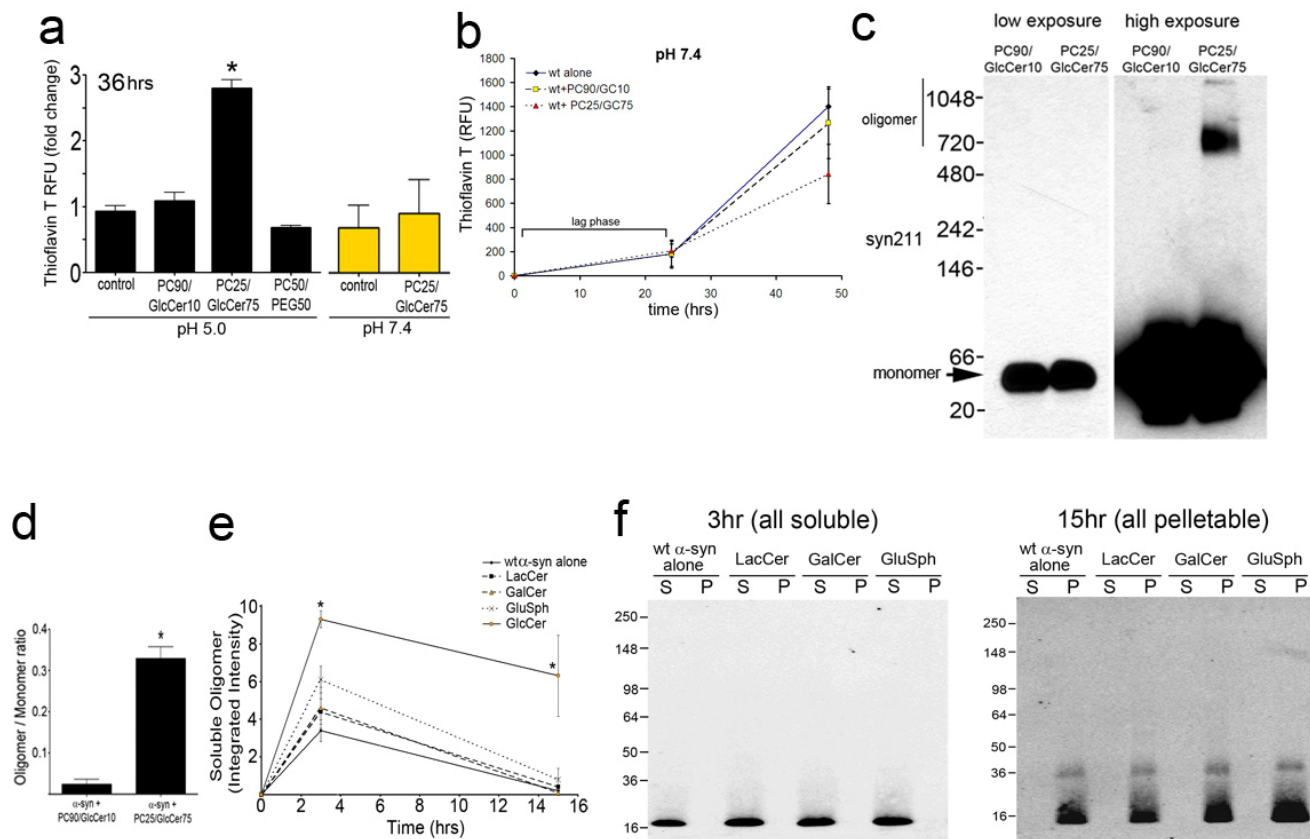

Figure S5

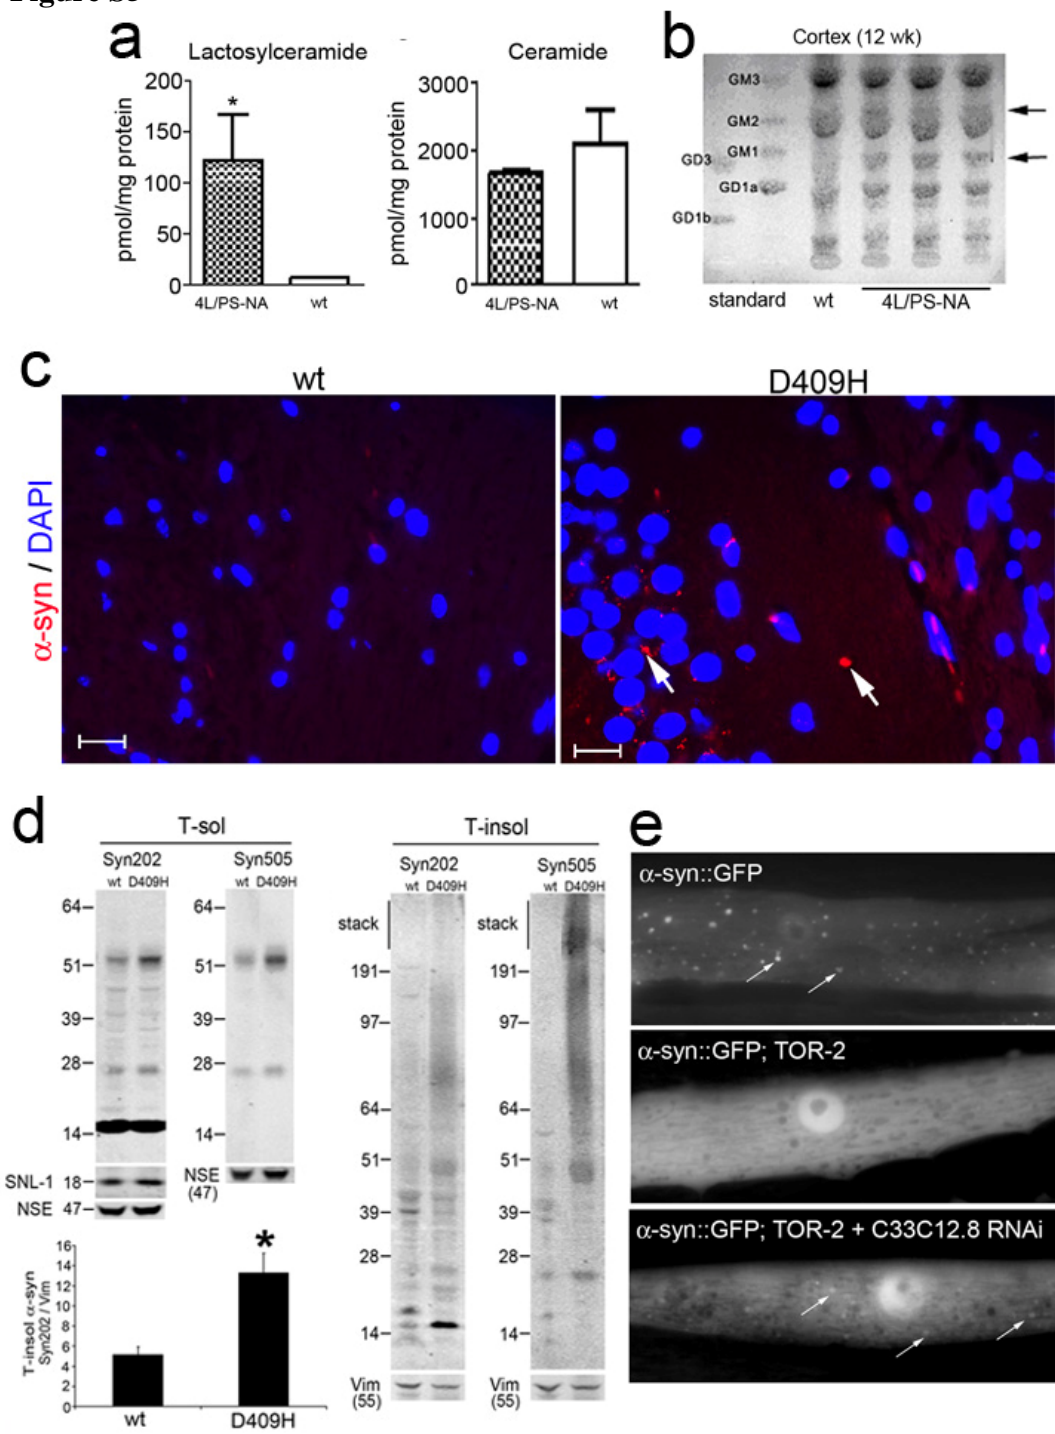



Figure S7

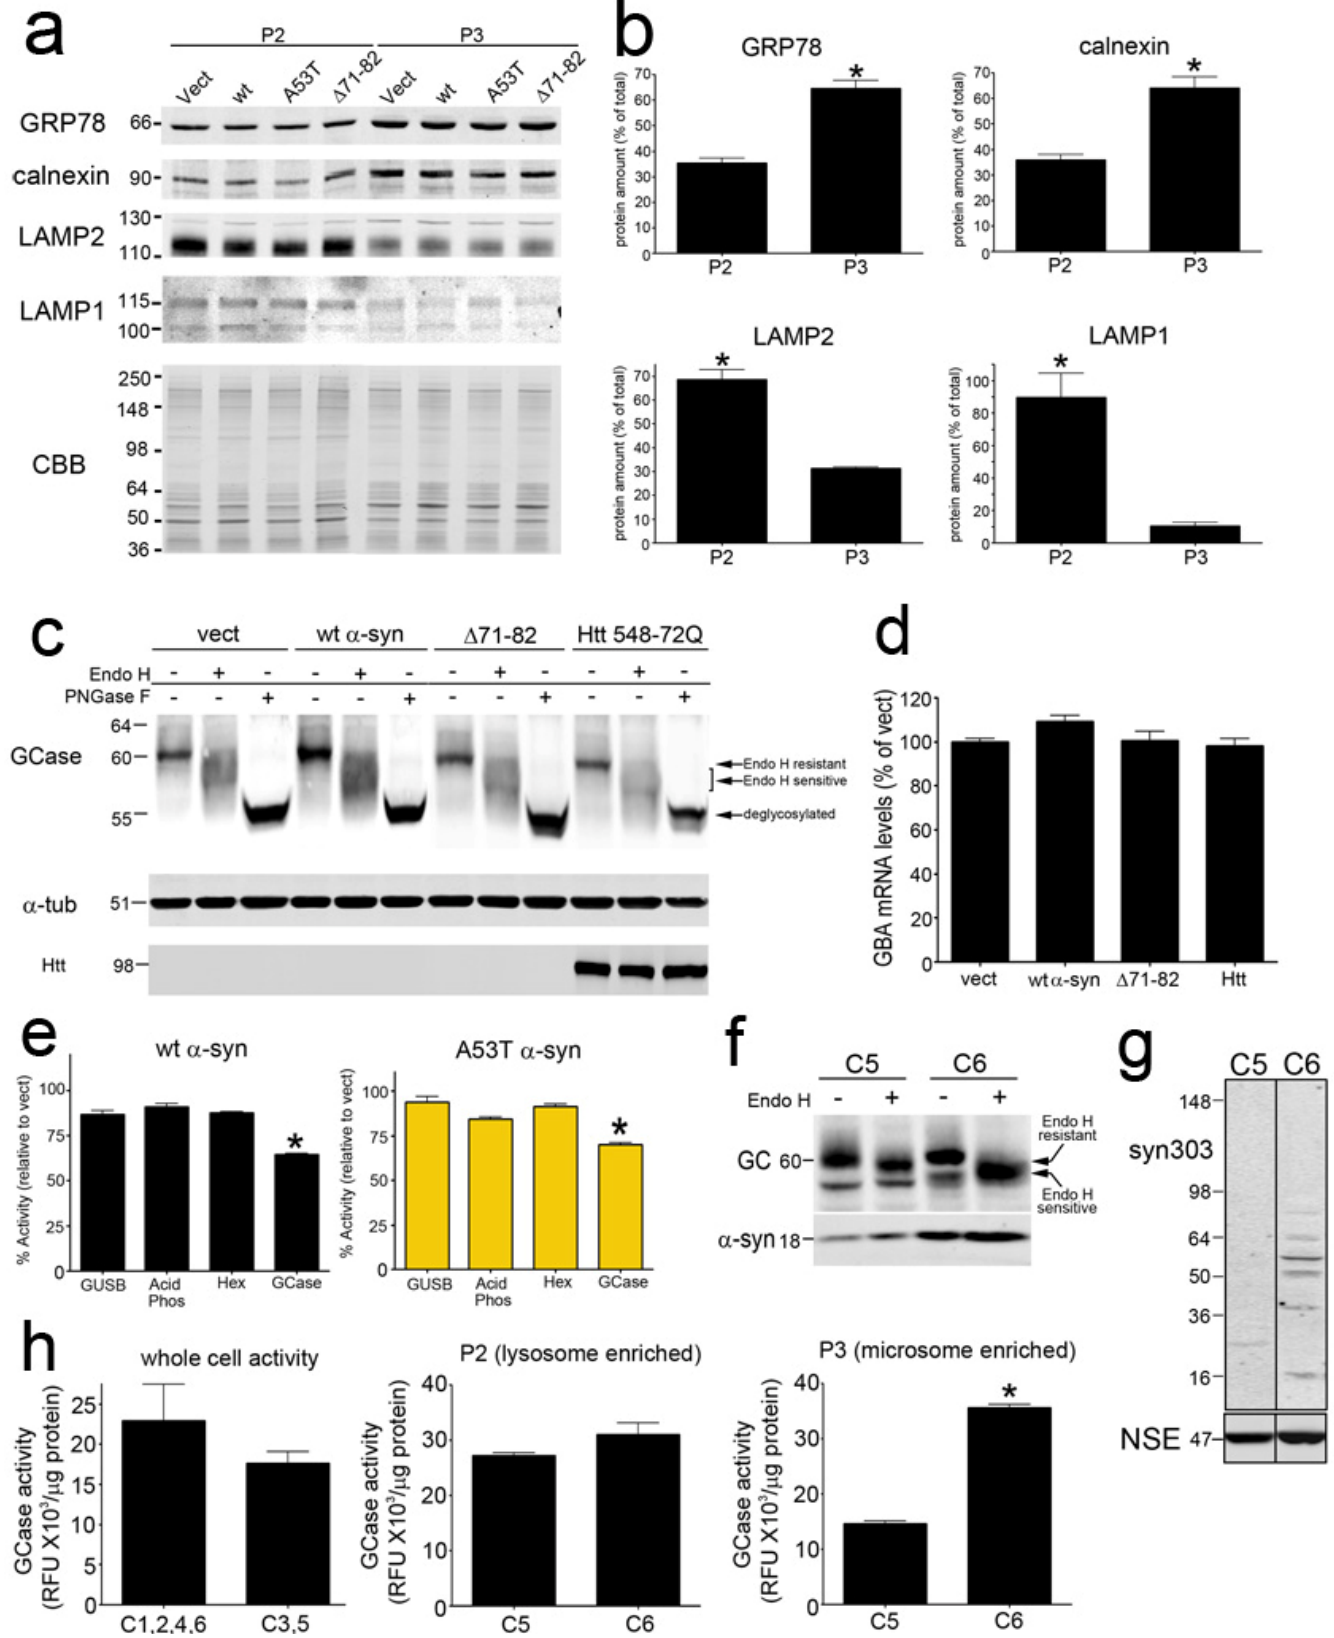

Supplement: NIHMS303607-supplement-02.pdf [file NIHMS303607-supplement-02.pdf]
